# Supplementary material for: GSK3β Deficiency Expands Obese Adipose Vasculature to Mitigate Metabolic Disorders
Source: PubMed Central journal article supplement — Circ Res. 2024 Dec 4;136(1):91–111. doi: 10.1161/CIRCRESAHA.124.325187 (PMC11692787; doi:10.1161/circresaha.124.325187), 2024-12-04
Supplement: res-136-91-s002.pdf [file res-136-91-s002.pdf]

## Major Resources Table

In order to allow validation and replication of experiments, all essential research materials listed in the Methods should be included in the Major Resources Table below. Authors are encouraged to use public repositories for protocols, data, code, and other materials and provide persistent identifiers and/or links to repositories when available. Authors may add or delete rows as needed.

### Animals (in vivo studies)

| Species      | Vendor or Source                                 | Background Strain | Sex | Persistent ID / URL                                                               |
|--------------|--------------------------------------------------|-------------------|-----|-----------------------------------------------------------------------------------|
| Mus musculus | In house, Originally from The Jackson Laboratory | C57BL/6J          | M   | <a href="https://www.jax.org/strain/000664">https://www.jax.org/strain/000664</a> |

### Genetically Modified Animals

|                               | Species      | Vendor or Source                      | Background Strain | Sex  | Persistent ID / URL                                                               |
|-------------------------------|--------------|---------------------------------------|-------------------|------|-----------------------------------------------------------------------------------|
| Adipoq-Cre mice               | Mus musculus | The Jackson Laboratory                | C57BL/6J          | M    | <a href="https://www.jax.org/strain/010803">https://www.jax.org/strain/010803</a> |
| Gsk3 $\beta$ -flox mice       | Mus musculus | Originally from Dr. James R. Woodgett | C57BL/6           | Both | N/A                                                                               |
| Gsk3 $\alpha$ -flox mice      | Mus musculus | Originally from Dr. James R. Woodgett | C57BL/6           | Both | N/A                                                                               |
| Gsk3 $\beta$ <sup>ADKO</sup>  | Mus musculus | In house                              | C57BL/6           | Both | N/A                                                                               |
| Gsk3 $\alpha$ <sup>ADKO</sup> | Mus musculus | In house                              | C57BL/6           | M    | N/A                                                                               |

### Antibodies

| Target antigen               | Vendor or Source          | Catalog #  | Working concentration                             | Persistent ID / URL                                                                                                                                                                                                                                                                                                                           |
|------------------------------|---------------------------|------------|---------------------------------------------------|-----------------------------------------------------------------------------------------------------------------------------------------------------------------------------------------------------------------------------------------------------------------------------------------------------------------------------------------------|
| Rat anti-F4/80 antibody      | eBioscience               | 14-4801-85 | 5 $\mu$ g/ml for IF                               | <a href="https://www.thermofisher.com/order/genome-database/generatePdf?productName=F4/80&amp;assayType=PRANT&amp;detailed=true&amp;productId=14-4801-85">https://www.thermofisher.com/order/genome-database/generatePdf?productName=F4/80&amp;assayType=PRANT&amp;detailed=true&amp;productId=14-4801-85</a>                                 |
| Rat Anti-Mouse CD31 antibody | BD Biosciences            | 553370     | 1:100 or IF                                       | <a href="https://www.bdbiosciences.com/en-us/products/reagents/flow-cytometry-reagents/research-reagents/single-color-antibodies-ruo/purified-rat-anti-mouse-cd31.553370">https://www.bdbiosciences.com/en-us/products/reagents/flow-cytometry-reagents/research-reagents/single-color-antibodies-ruo/purified-rat-anti-mouse-cd31.553370</a> |
| Rabbit Anti-HIF-1 $\alpha$   | Abcam                     | ab179483   | 2 $\mu$ g for IP; 1:100 for IF, and 1:1000 for WB | <a href="https://www.abcam.com/en-us/products/primary-antibodies/hif-1-alpha-antibody-epr16897-ab179483">https://www.abcam.com/en-us/products/primary-antibodies/hif-1-alpha-antibody-epr16897-ab179483</a>                                                                                                                                   |
| Rabbit Anti-HIF-2 $\alpha$   | Cell Signaling Technology | 57921      | 2 $\mu$ g for IP; 1:100 for IF, and 1:1000 for WB | <a href="https://www.cellsignal.cn/products/primary-antibodies/hif-2a-e2n9w-rabbit-mab/57921">https://www.cellsignal.cn/products/primary-antibodies/hif-2a-e2n9w-rabbit-mab/57921</a>                                                                                                                                                         |
| Mouse Anti-SOD1              | Santa Cruz Biotechnology  | sc-101523  | 1:1000 for WB                                     | <a href="https://www.scbt.com/p/sod-1-antibody-24">https://www.scbt.com/p/sod-1-antibody-24</a>                                                                                                                                                                                                                                               |
| Mouse Anti-ITGA5             | Santa Cruz Biotechnology  | sc-376199  | 1:1000 for WB                                     | <a href="https://www.scbt.com/p/integrin-alpha5-antibody-c-9">https://www.scbt.com/p/integrin-alpha5-antibody-c-9</a>                                                                                                                                                                                                                         |
| Mouse Anti- $\beta$ -actin   | Santa Cruz Biotechnology  | sc-1615    | 1:1000 for WB                                     | <a href="https://www.scbt.com/p/actin-antibody-c-11">https://www.scbt.com/p/actin-antibody-c-11</a>                                                                                                                                                                                                                                           |

|                                                                             |                           |           |                              |                                                                                                                                                                                                                                                                                                                             |
|-----------------------------------------------------------------------------|---------------------------|-----------|------------------------------|-----------------------------------------------------------------------------------------------------------------------------------------------------------------------------------------------------------------------------------------------------------------------------------------------------------------------------|
| anti-CHOP                                                                   | Cell Signaling Technology | 5554      | 1:1000 for WB                | <a href="https://www.cellsignal.cn/products/primary-antibodies/chop-d46f1-rabbit-mab/5554">https://www.cellsignal.cn/products/primary-antibodies/chop-d46f1-rabbit-mab/5554</a>                                                                                                                                             |
| anti-calnexin                                                               | Cell Signaling Technology | 2679      | 1:1000 for WB                | <a href="https://www.cellsignal.cn/products/primary-antibodies/calnexin-c5c9-rabbit-mab/2679">https://www.cellsignal.cn/products/primary-antibodies/calnexin-c5c9-rabbit-mab/2679</a>                                                                                                                                       |
| anti-phospho (p)-AKT Serine 473                                             | Cell Signaling Technology | 9271      | 1:1000 for WB                | <a href="https://www.cellsignal.cn/products/primary-antibodies/phospho-akt-ser473-antibody/9271">https://www.cellsignal.cn/products/primary-antibodies/phospho-akt-ser473-antibody/9271</a>                                                                                                                                 |
| total (t)-AKT                                                               | Cell Signaling Technology | 9272      | 1:1000 for WB                | <a href="https://www.cellsignal.cn/products/primary-antibodies/akt-antibody/9272">https://www.cellsignal.cn/products/primary-antibodies/akt-antibody/9272</a>                                                                                                                                                               |
| anti-phospho (p)-AMPK                                                       | Cell Signaling Technology | 2535      | 1:1000 for WB                | <a href="https://www.cellsignal.cn/products/primary-antibodies/phospho-ampka-thr172-40h9-rabbit-mab/2535">https://www.cellsignal.cn/products/primary-antibodies/phospho-ampka-thr172-40h9-rabbit-mab/2535</a>                                                                                                               |
| total (t)-AMPK                                                              | Cell Signaling Technology | 5831      | 1:1000 for WB                | <a href="https://www.cellsignal.cn/products/primary-antibodies/ampka-d5a2-rabbit-mab/5831">https://www.cellsignal.cn/products/primary-antibodies/ampka-d5a2-rabbit-mab/5831</a>                                                                                                                                             |
| total (t)-GSK3 $\beta$                                                      | Cell Signaling Technology | 9315      | 1:1000 for WB                | <a href="https://www.cellsignal.cn/products/primary-antibodies/gsk-3b-27c10-rabbit-mab/9315">https://www.cellsignal.cn/products/primary-antibodies/gsk-3b-27c10-rabbit-mab/9315</a>                                                                                                                                         |
| Mouse Anti-VEGF                                                             | Santa Cruz Biotechnology  | sc-7269   | 1:1000 for WB                | <a href="https://www.scbt.com/p/vegf-antibody-c-1">https://www.scbt.com/p/vegf-antibody-c-1</a>                                                                                                                                                                                                                             |
| Mouse Anti-VEGFB                                                            | Santa Cruz Biotechnology  | sc-80442  | 1:1000 for WB                | <a href="https://www.scbt.com/p/vegf-b-antibody-j-14i">https://www.scbt.com/p/vegf-b-antibody-j-14i</a>                                                                                                                                                                                                                     |
| Goat Anti-VEGFR1                                                            | R&D systems               | AF471     | 1:1000 for WB                | <a href="https://www.rndsystems.com/products/mouse-vegfr1-flt-1-antibody_af4711-rabbit-mab/5554">https://www.rndsystems.com/products/mouse-vegfr1-flt-1-antibody_af4711-rabbit-mab/5554</a>                                                                                                                                 |
| Mouse Anti-VEGFR2                                                           | R&D systems               | AF644     | 1:1000 for WB                | <a href="https://www.rndsystems.com/products/mouse-vegfr2-kdr-flk-1-antibody_af644">https://www.rndsystems.com/products/mouse-vegfr2-kdr-flk-1-antibody_af644</a>                                                                                                                                                           |
| Rabbit Anti-UCP1                                                            | Cell Signaling Technology | 72298     | 1:100 for IF                 | <a href="https://www.cellsignal.cn/products/primary-antibodies/ucp1-e9z2v-xp-rabbit-mab/72298">https://www.cellsignal.cn/products/primary-antibodies/ucp1-e9z2v-xp-rabbit-mab/72298</a>                                                                                                                                     |
| Donkey anti-Rat Secondary Antibody, Alexa Fluor™ 594                        | Thermo Fisher Scientific  | A-21209   | 1:200 for IF                 | <a href="https://www.thermofisher.com/antibody/product/Donkey-anti-Rat-IgG-H-L-Highly-Cross-Adsorbed-Secondary-Antibody-Polyclonal/A-21209v-xp-rabbit-mab/72298">https://www.thermofisher.com/antibody/product/Donkey-anti-Rat-IgG-H-L-Highly-Cross-Adsorbed-Secondary-Antibody-Polyclonal/A-21209v-xp-rabbit-mab/72298</a> |
| Lycopersicon Esculentum (Tomato) Lectin (LEL, TL), DyLight 594              | Vectorlab                 | DL-1177-1 | 50 $\mu$ g/100 $\mu$ l/mouse | <a href="https://vectorlabs.com/products/dyLight-594-lycopersicon-esculentum-tomato?srltid=AfmBOoqUvmbNtAe7y3C1JLPKEnuVjvqEFLNvj75WohS65h6M-AoX5Q9f">https://vectorlabs.com/products/dyLight-594-lycopersicon-esculentum-tomato?srltid=AfmBOoqUvmbNtAe7y3C1JLPKEnuVjvqEFLNvj75WohS65h6M-AoX5Q9f</a>                         |
| Goat anti-Rat IgG (H+L) Cross-Adsorbed Secondary Antibody, Alexa Fluor™ 488 | Thermo Fisher Scientific  | A-11006   | 1:200 for IF                 | <a href="https://www.thermofisher.com/antibody/product/Goat-anti-Rat-IgG-H-L-Cross-Adsorbed-Secondary-Antibody-Polyclonal/A-11006">https://www.thermofisher.com/antibody/product/Goat-anti-Rat-IgG-H-L-Cross-Adsorbed-Secondary-Antibody-Polyclonal/A-11006</a>                                                             |

|  |  |  |  |  |
|--|--|--|--|--|
|  |  |  |  |  |
|--|--|--|--|--|

### DNA/cDNA Clones

| Clone Name           | Sequence                                                              | Source / Repository   | Persistent ID / URL                                                                                                   |
|----------------------|-----------------------------------------------------------------------|-----------------------|-----------------------------------------------------------------------------------------------------------------------|
| Primer-Mouse-16srRNA | Forward:<br>ctggagcctgttttgcctctg<br>Reverse:<br>tgagatggactgtcggatgg | product length =100bp | <a href="https://www.ncbi.nlm.nih.gov/nucleotide/NM_013647.2">https://www.ncbi.nlm.nih.gov/nucleotide/NM_013647.2</a> |
| Primer-Mouse-Col1A1  | Forward:<br>gacttctctggctcctctgt<br>Reverse:<br>cacggaaactccagctgat   | product length =113bp | <a href="https://www.ncbi.nlm.nih.gov/nucore/NM_007742.4">https://www.ncbi.nlm.nih.gov/nucore/NM_007742.4</a>         |
| Primer-Mouse-Col3A1  | Forward:<br>tggcattctgggagaa<br>Reverse:<br>ttctcccactccagactg        | product length =158bp | <a href="https://www.ncbi.nlm.nih.gov/nucore/NM_009930.2">https://www.ncbi.nlm.nih.gov/nucore/NM_009930.2</a>         |
| Primer-Mouse-Fn1     | Forward:<br>gaccggacattttaccaga<br>Reverse:<br>ctgggggtctccgtgataat   | product length =168bp | <a href="https://www.ncbi.nlm.nih.gov/nucore/NM_001276413.1">https://www.ncbi.nlm.nih.gov/nucore/NM_001276413.1</a>   |
| Primer-Mouse-Itga4   | Forward:<br>ttttacatgaagagcga<br>Reverse:<br>attccagcttgacatgatgc     | product length =153bp | <a href="https://www.ncbi.nlm.nih.gov/nucore/NM_010576.4">https://www.ncbi.nlm.nih.gov/nucore/NM_010576.4</a>         |
| Primer-Mouse-Itga5   | Forward:<br>tgggggcttcaacctagac<br>Reverse:<br>tagacagcaccacctgcag    | product length =174bp | <a href="https://www.ncbi.nlm.nih.gov/nucore/NM_010577.4">https://www.ncbi.nlm.nih.gov/nucore/NM_010577.4</a>         |
| Primer-Mouse-ItgaX   | Forward:<br>gacgtgaatggggacagtct<br>Reverse:<br>cactcagtgactgcccaaaa  | product length =181bp | <a href="https://www.ncbi.nlm.nih.gov/nucore/NM_021334.3">https://www.ncbi.nlm.nih.gov/nucore/NM_021334.3</a>         |
| Primer-Mouse-ItgaM   | Forward:<br>tggcttcaatctggacactg                                      | product length =175bp | <a href="https://www.ncbi.nlm.nih.gov/nucore/NM_001082960.1">https://www.ncbi.nlm.nih.gov/nucore/NM_001082960.1</a>   |

|                                   |                                                                               |                             |                                                                                                                     |
|-----------------------------------|-------------------------------------------------------------------------------|-----------------------------|---------------------------------------------------------------------------------------------------------------------|
|                                   | Reverse:<br>acaccggcttgctgt<br>agt                                            |                             |                                                                                                                     |
| Primer-<br>Mouse-<br>Itgb2        | Forward:<br>agctggcacacaaactt<br>tcc<br>Reverse:<br>tgatgagctgcaccacg<br>tt   | product<br>length<br>=153bp | <a href="https://www.ncbi.nlm.nih.gov/nucore/NM_008404.5">https://www.ncbi.nlm.nih.gov/nucore/NM_008404.5</a>       |
| Primer-<br>Mouse-<br>Ucp3         | Forward:<br>ccggtggatgtggtaaa<br>gac<br>Reverse:<br>ttaaggcccttctcagtt<br>gc  | product<br>length<br>=196bp | <a href="https://www.ncbi.nlm.nih.gov/nucore/NM_009464.3">https://www.ncbi.nlm.nih.gov/nucore/NM_009464.3</a>       |
| Primer-<br>Mouse-<br>Catalas<br>e | Forward:<br>ggcttttgaccaagca<br>ata<br>Reverse:<br>ccatcacgctgtagtt<br>gg     | product<br>length<br>=174bp | <a href="https://www.ncbi.nlm.nih.gov/nucore/NM_009804.2">https://www.ncbi.nlm.nih.gov/nucore/NM_009804.2</a>       |
| Primer-<br>Mouse-<br>Sod1         | Forward:<br>gtgcagggaaccatcc<br>act<br>Reverse:<br>ccatactgatggacgtg<br>gaa   | product<br>length<br>=110bp | <a href="https://www.ncbi.nlm.nih.gov/nucore/NM_011434.2">https://www.ncbi.nlm.nih.gov/nucore/NM_011434.2</a>       |
| Primer-<br>Mouse-<br>Sod2         | Forward:<br>tcaatggtgggggacat<br>att<br>Reverse:<br>gaacctggactcccac<br>aga   | product<br>length<br>=166bp | <a href="https://www.ncbi.nlm.nih.gov/nucleotide/76253932">https://www.ncbi.nlm.nih.gov/nucleotide/76253932</a>     |
| Primer-<br>Mouse-<br>Sod3         | Forward:<br>ctgctcgctcacataac<br>agc<br>Reverse:<br>ggcaagcctgtctgct<br>agg   | product<br>length<br>=249bp | <a href="https://www.ncbi.nlm.nih.gov/nucleotide/86439990">https://www.ncbi.nlm.nih.gov/nucleotide/86439990</a>     |
| Primer-<br>Mouse-<br>Grp78        | Forward:<br>tcagcatcaagcaagg<br>attg<br>Reverse:<br>gctccttgccattgaag<br>aac  | product<br>length<br>=248bp | <a href="https://www.ncbi.nlm.nih.gov/nucore/NM_001163434.1">https://www.ncbi.nlm.nih.gov/nucore/NM_001163434.1</a> |
| Primer-<br>Mouse-<br>Grp94        | Forward:<br>cagcacatctgggaatc<br>aga<br>Reverse:<br>ctccacacgtagatggg<br>aaag | product<br>length<br>=191bp | <a href="https://www.ncbi.nlm.nih.gov/nucore/NM_011631.1">https://www.ncbi.nlm.nih.gov/nucore/NM_011631.1</a>       |
| Primer-<br>Mouse-<br>Atf4         | Forward:<br>gaaacctcatgggttct<br>cca                                          | product<br>length<br>=203bp | <a href="https://www.ncbi.nlm.nih.gov/nucore/NM_001287180.1">https://www.ncbi.nlm.nih.gov/nucore/NM_001287180.1</a> |

|                                    |                                                                                   |                                 |                                                                                                                     |
|------------------------------------|-----------------------------------------------------------------------------------|---------------------------------|---------------------------------------------------------------------------------------------------------------------|
|                                    | Reverse:<br>agagctcatctggcatg<br>gtt                                              |                                 |                                                                                                                     |
| Primer-<br>Mouse-<br>Atf6          | Forward:<br>cttctccagttgctcca<br>tc<br>Reverse:<br>caggaccagtgcagg<br>cttc        | product<br>length<br>=183bp     | <a href="https://www.ncbi.nlm.nih.gov/nucore/NM_001081304.1">https://www.ncbi.nlm.nih.gov/nucore/NM_001081304.1</a> |
| Primer-<br>Mouse-<br>HIF2 $\alpha$ | Forward:<br>agtagcctctgtggctc<br>caa<br>Reverse:<br>tccagggcatgtaga<br>actc       | product<br>length<br>=230bp     | <a href="https://www.ncbi.nlm.nih.gov/nucore/NM_010137.3">https://www.ncbi.nlm.nih.gov/nucore/NM_010137.3</a>       |
| Primer-<br>Mouse-<br>HIF1 $\alpha$ | Forward:<br>cacgggccatattcatg<br>tct<br>Reverse:<br>tatcgaggctgtgtcga<br>ctg      | product<br>length<br>=167bp     | <a href="https://www.ncbi.nlm.nih.gov/nucore/NM_001313919.2">https://www.ncbi.nlm.nih.gov/nucore/NM_001313919.2</a> |
| Primer-<br>Mouse-<br>LPL           | Forward:<br>ttcaaccacagcagcaa<br>gac<br>Reverse:<br>aatctggccacatcatt<br>cc       | product<br>length<br>=<br>210bp | <a href="https://www.ncbi.nlm.nih.gov/nucleotide/AH001996.2">https://www.ncbi.nlm.nih.gov/nucleotide/AH001996.2</a> |
| Primer-<br>Mouse-<br>CD68          | Forward:<br>cttcccacaggcagca<br>cag<br>Reverse:<br>aatgatgagaggcagc<br>aagagg     | product<br>length<br>=235bp     | <a href="https://www.ncbi.nlm.nih.gov/nucore/NM_001291058.1">https://www.ncbi.nlm.nih.gov/nucore/NM_001291058.1</a> |
| Primer-<br>Mouse-<br>F4/80         | Forward:<br>ctttggctatgggcttc<br>agtc<br>Reverse:<br>gcaaggaggacagagt<br>ttatcgtg | product<br>length<br>=165bp     | <a href="https://www.ncbi.nlm.nih.gov/nucore/NM_001355722.2">https://www.ncbi.nlm.nih.gov/nucore/NM_001355722.2</a> |
| Primer-<br>Mouse-<br>CD11c         | Forward:<br>ctggatagcctttctctg<br>ctg<br>Reverse:<br>gcacactgtgtccgaac<br>tc      | product<br>length<br>=113bp     | <a href="https://www.ncbi.nlm.nih.gov/nucore/NM_001363984.1">https://www.ncbi.nlm.nih.gov/nucore/NM_001363984.1</a> |
| Primer-<br>Mouse-<br>IL-1 $\beta$  | Forward:<br>ctccatgagctttgtaca<br>agg<br>Reverse:<br>tgctgatgtaccagttgg<br>gg     | product<br>length<br>=245bp     | <a href="https://www.ncbi.nlm.nih.gov/nucore/NM_008361.4">https://www.ncbi.nlm.nih.gov/nucore/NM_008361.4</a>       |
| Primer-<br>Mouse-<br>TNF $\alpha$  | Forward:<br>catcttctcaaaattcga<br>gtga                                            | product<br>length<br>=175bp     | <a href="https://www.ncbi.nlm.nih.gov/nucore/NM_013693.3">https://www.ncbi.nlm.nih.gov/nucore/NM_013693.3</a>       |

|                            |                                                                                  |                                 |                                                                                                                     |
|----------------------------|----------------------------------------------------------------------------------|---------------------------------|---------------------------------------------------------------------------------------------------------------------|
|                            | Reverse:<br>tgggagtagacaaggt<br>acaaccc                                          |                                 |                                                                                                                     |
| Primer-Mouse-Ccl2          | Forward:<br>cccaatgagtaggctg<br>gaga<br>Reverse:<br>gaactgcctttgccttctt<br>g     | product<br>length<br>=<br>200bp | <a href="https://www.ncbi.nlm.nih.gov/nucleotide/BC055070.1">https://www.ncbi.nlm.nih.gov/nucleotide/BC055070.1</a> |
| Primer-Mouse-Prdm16        | Forward:<br>cagcacggtgaagccattc<br>Reverse:<br>gcgtgcatccgcttgtg                 | product<br>length<br>=87bp      | <a href="https://www.ncbi.nlm.nih.gov/nucore/NM_001177995.2">https://www.ncbi.nlm.nih.gov/nucore/NM_001177995.2</a> |
| Primer-Mouse-Ucp1          | Forward:<br>ggccttgtaacaaca<br>aaatac<br>Reverse:<br>ggcaacaagagctgac<br>agtaaat | product<br>length<br>=67bp      | <a href="https://www.ncbi.nlm.nih.gov/nucore/NM_009463.3">https://www.ncbi.nlm.nih.gov/nucore/NM_009463.3</a>       |
| Primer-Mouse-PGC1 $\alpha$ | Forward:<br>acagctttctgggtggat<br>tg<br>Reverse:<br>aatgagggcaatccgt<br>ctt      | product<br>length<br>=181bp     | <a href="https://www.ncbi.nlm.nih.gov/nucore/NM_001402987.1">https://www.ncbi.nlm.nih.gov/nucore/NM_001402987.1</a> |
| Primer-Mouse-PGC1 $\beta$  | Forward:<br>ctggaactgaggctggt<br>ct<br>Reverse:<br>ttccagaactggatga<br>agg       | product<br>length<br>=225bp     | <a href="https://www.ncbi.nlm.nih.gov/nucore/NM_001364996.1">https://www.ncbi.nlm.nih.gov/nucore/NM_001364996.1</a> |
| Primer-Mouse-VEGFa         | Forward:<br>cacgacagaaggagagcaga<br>Reverse:<br>ctccagggttcatcgta<br>ac          | product<br>length<br>=193bp     | <a href="https://www.ncbi.nlm.nih.gov/nucore/NM_001025250.3">https://www.ncbi.nlm.nih.gov/nucore/NM_001025250.3</a> |
| Primer-Mouse-VEGFb         | Forward:<br>ggcttagactcaacc<br>aga<br>Reverse:<br>gtcctggggcagtgac<br>ct         | product<br>length<br>=163bp     | <a href="https://www.ncbi.nlm.nih.gov/nucleotide/297632417">https://www.ncbi.nlm.nih.gov/nucleotide/297632417</a>   |
| Primer-Mouse-VEGFc         | Forward:<br>ccaggacaggggacagtgtgta<br>Reverse:<br>tgctgaggtaacctgtg<br>ctg       | product<br>length<br>=246bp     | <a href="https://www.ncbi.nlm.nih.gov/nucore/NM_009506.2">https://www.ncbi.nlm.nih.gov/nucore/NM_009506.2</a>       |
| Primer-Mouse-Flt1 (VEGFR1) | Forward:<br>caggaggacaaaagg<br>ctgag                                             | product<br>length<br>=248bp     | <a href="https://www.ncbi.nlm.nih.gov/nucore/NM_001363135.1">https://www.ncbi.nlm.nih.gov/nucore/NM_001363135.1</a> |

|                                          |                                                                               |                                 |                                                                                                                     |
|------------------------------------------|-------------------------------------------------------------------------------|---------------------------------|---------------------------------------------------------------------------------------------------------------------|
|                                          | Reverse:<br>tccgtcatgtgcacaag<br>ttt                                          |                                 |                                                                                                                     |
| Primer-<br>Mouse-<br>Kdr<br>(VEGF<br>R2) | Forward:<br>ttctggactctccctgcc<br>ta<br>Reverse:<br>ctggttctccaatggg<br>ata   | product<br>length<br>=176bp     | <a href="https://www.ncbi.nlm.nih.gov/nucore/NM_001403141.1">https://www.ncbi.nlm.nih.gov/nucore/NM_001403141.1</a> |
| Primer-<br>Mouse-<br>CD31                | Forward:<br>atgaccagcaacattc<br>aca<br>Reverse:<br>cacagagcaccgaagt<br>acca   | product<br>length<br>=200bp     | <a href="https://www.ncbi.nlm.nih.gov/nucore/NM_001032378.2">https://www.ncbi.nlm.nih.gov/nucore/NM_001032378.2</a> |
| Primer-<br>Mouse-<br>Cxcr4               | Forward:<br>aaaccccaaacacatt<br>cac<br>Reverse:<br>tggtaacccatgaccag<br>gat   | product<br>length<br>=238bp     | <a href="https://www.ncbi.nlm.nih.gov/nucleotide/2496538637">https://www.ncbi.nlm.nih.gov/nucleotide/2496538637</a> |
| Primer-<br>Mouse-<br>Mif                 | Forward:<br>gtgccagaaccgcaa<br>ctac<br>Reverse:<br>ggcagcgttcattgctg<br>aat   | product<br>length<br>=107bp     | <a href="https://www.ncbi.nlm.nih.gov/nucore/NM_010798.3">https://www.ncbi.nlm.nih.gov/nucore/NM_010798.3</a>       |
| Primer-<br>Mouse-<br>HK1                 | Forward:<br>aagatgctccaacctt<br>gt<br>Reverse:<br>gatgttctctgggtgct<br>gt     | product<br>length<br>=171bp     | <a href="https://www.ncbi.nlm.nih.gov/nucore/NM_001146100.2">https://www.ncbi.nlm.nih.gov/nucore/NM_001146100.2</a> |
| Primer-<br>Mouse-<br>ANGP<br>T4          | Forward:<br>cagcaggacacaatcc<br>agaa<br>Reverse:<br>gctgttggtggacagt<br>gag   | product<br>length<br>=<br>172bp | <a href="https://www.ncbi.nlm.nih.gov/nucore/NM_009641.2">https://www.ncbi.nlm.nih.gov/nucore/NM_009641.2</a>       |
| Primer-<br>Mouse-<br>Bnip3               | Forward:<br>gaactgcaactcagcaa<br>tgg<br>Reverse:<br>gctgtggctgtctatttc<br>agc | product<br>length<br>=195bp     | <a href="https://www.ncbi.nlm.nih.gov/nucore/NM_009760.4">https://www.ncbi.nlm.nih.gov/nucore/NM_009760.4</a>       |
| Primer-<br>Mouse-<br>Ndr1                | Forward:<br>cctacatggctccctgc<br>at<br>Reverse:<br>acatggcagacagcaa<br>aatg   | product<br>length<br>=165bp     | <a href="https://www.ncbi.nlm.nih.gov/nucore/NM_008681.2">https://www.ncbi.nlm.nih.gov/nucore/NM_008681.2</a>       |
| Primer-<br>Mouse-<br>Prkca               | Forward:<br>agaaggacgtggtgat<br>ccag                                          | product<br>length<br>=153bp     | <a href="https://www.ncbi.nlm.nih.gov/nucore/NM_011101.3">https://www.ncbi.nlm.nih.gov/nucore/NM_011101.3</a>       |

|                     |                                                                             |                       |                                                                                                                                                                                                                                               |
|---------------------|-----------------------------------------------------------------------------|-----------------------|-----------------------------------------------------------------------------------------------------------------------------------------------------------------------------------------------------------------------------------------------|
|                     | Reverse:<br>cgttgacgtattccatgacg                                            |                       |                                                                                                                                                                                                                                               |
| Primer-Mouse-Pycard | Forward:<br>acatgggcttacaggagctg<br>Reverse:<br>cgaactgcctggtactgtcc        | product length =210bp | <a href="https://ncbi.nlm.nih.gov/nuccore/NC_000073.7?report=genbank&amp;from=127590545&amp;to=127593039&amp;strand=true">https://ncbi.nlm.nih.gov/nuccore/NC_000073.7?report=genbank&amp;from=127590545&amp;to=127593039&amp;strand=true</a> |
| Primer-Mouse-Aim2   | Forward:<br>cctgattcaaaagtgcaggtg<br>Reverse:<br>gaggcagcagagcagtttc        | product length =170bp | <a href="https://ncbi.nlm.nih.gov/nuccore/NC_000067.7?report=genbank&amp;from=173177105&amp;to=173293606">https://ncbi.nlm.nih.gov/nuccore/NC_000067.7?report=genbank&amp;from=173177105&amp;to=173293606</a>                                 |
| Primer-Mouse-Casp1  | Forward:<br>tgctacagaagattctaaaggagga<br>Reverse:<br>cctctgaaggattttcttccat | product length =152bp | <a href="https://ncbi.nlm.nih.gov/nuccore/NC_000075.7?report=genbank&amp;from=5298517&amp;to=5307281">https://ncbi.nlm.nih.gov/nuccore/NC_000075.7?report=genbank&amp;from=5298517&amp;to=5307281</a>                                         |
| Primer-Mouse-Bcl2   | Forward:<br>gaggattgtggccttcttg<br>Reverse:<br>catgctggggccatatagtt         | product length =180bp | <a href="https://ncbi.nlm.nih.gov/nuccore/NC_000067.7?report=genbank&amp;from=106465906&amp;to=106642020&amp;strand=true">https://ncbi.nlm.nih.gov/nuccore/NC_000067.7?report=genbank&amp;from=106465906&amp;to=106642020&amp;strand=true</a> |
| Primer-Mouse-Bax    | Forward:<br>gatgattgctgacgtggaca<br>Reverse:<br>gatcagctcgggcacttag         | product length =160bp | <a href="https://ncbi.nlm.nih.gov/nuccore/NC_000073.7?report=genbank&amp;from=4511124&amp;to=45116332&amp;strand=true">https://ncbi.nlm.nih.gov/nuccore/NC_000073.7?report=genbank&amp;from=4511124&amp;to=45116332&amp;strand=true</a>       |
| Primer-Mouse-Bak1   | Forward:<br>aggtgggctgcatgagt<br>Reverse:<br>aggggcaagttgtccatctc           | product length =162bp | <a href="https://ncbi.nlm.nih.gov/nuccore/NC_000083.7?report=genbank&amp;from=27238786&amp;to=27247601&amp;strand=true">https://ncbi.nlm.nih.gov/nuccore/NC_000083.7?report=genbank&amp;from=27238786&amp;to=27247601&amp;strand=true</a>     |
| Primer-Mouse-Casp3  | Forward:<br>caaaacctcagtgattcaaaa<br>Reverse:<br>gcatatgccatttcagat         | product length =130bp | <a href="https://ncbi.nlm.nih.gov/nuccore/NC_000074.7?report=genbank&amp;from=47070326&amp;to=47092733">https://ncbi.nlm.nih.gov/nuccore/NC_000074.7?report=genbank&amp;from=47070326&amp;to=47092733</a>                                     |
| Primer-Mouse-Casp8  | Forward:<br>ttggaggaaggcaatctgtc<br>Reverse:<br>tctcaattccaactcgctca        | product length =190bp | <a href="https://ncbi.nlm.nih.gov/nuccore/NC_000067.7?report=genbank&amp;from=58834553&amp;to=58886663">https://ncbi.nlm.nih.gov/nuccore/NC_000067.7?report=genbank&amp;from=58834553&amp;to=58886663</a>                                     |
| Primer-Mouse-Casp9  | Forward:<br>gccagaggttctcagaccag                                            | product length =210bp | <a href="https://ncbi.nlm.nih.gov/nuccore/NC_000070.7?report=genbank&amp;from=141520923&amp;to=141543289">https://ncbi.nlm.nih.gov/nuccore/NC_000070.7?report=genbank&amp;from=141520923&amp;to=141543289</a>                                 |



|  |                                     |  |  |
|--|-------------------------------------|--|--|
|  | Reverse:<br>tcaagttgtcacggtcc<br>aa |  |  |
|--|-------------------------------------|--|--|

### Cultured Cells

| Name   | Vendor or Source | Sex (F, M, or unknown) | Persistent ID / URL                                                                                                                                   |
|--------|------------------|------------------------|-------------------------------------------------------------------------------------------------------------------------------------------------------|
| 3B-11  | ATCC, CRL-2160   | M                      | <a href="https://www.atcc.org/products/crl-2160#detailed-product-information">https://www.atcc.org/products/crl-2160#detailed-product-information</a> |
| 3T3-L1 | ATCC, CL-173     | unknown                | <a href="https://www.atcc.org/products/cl-173">https://www.atcc.org/products/cl-173</a>                                                               |
| EOMA   | ATCC, CRL-2586   | unknown                | <a href="https://www.atcc.org/products/crl-2586">https://www.atcc.org/products/crl-2586</a>                                                           |

### Data & Code Availability

| Description | Source / Repository | Persistent ID / URL |
|-------------|---------------------|---------------------|
| RNA-SEQ     | NGDC                | OMIX007374          |

### Other

| Name                            | Vendor or Source         | Catalog #    | Persistent ID / URL                                                                                                                                                                                                                                       |
|---------------------------------|--------------------------|--------------|-----------------------------------------------------------------------------------------------------------------------------------------------------------------------------------------------------------------------------------------------------------|
| Pierce™ IP Lysis Buffer         | Thermo Fisher Scientific | 87787        | <a href="https://www.thermofisher.com/order/catalog/product/87787?SID=srch-srp-87787">https://www.thermofisher.com/order/catalog/product/87787?SID=srch-srp-87787</a>                                                                                     |
| PT2385                          | Selleck Chemicals,       | S8352        | <a href="https://www.selleckchem.com/products/pt2385.html">https://www.selleckchem.com/products/pt2385.html</a>                                                                                                                                           |
| Protein A/G beads               | Thermo Fisher Scientific | 26161        |                                                                                                                                                                                                                                                           |
| Compound C                      | Selleck Chemicals        | S7840        | <a href="https://www.selleckchem.com/products/dorsomorphin.html">https://www.selleckchem.com/products/dorsomorphin.html</a>                                                                                                                               |
| CHIR99021                       | Sigma-Aldrich            | SML1046      | <a href="https://www.sigmaaldrich.com/MO/en/product/sigma/sml1046">https://www.sigmaaldrich.com/MO/en/product/sigma/sml1046</a>                                                                                                                           |
| SB216763                        | Selleck Chemicals        | S1075        | <a href="https://www.selleckchem.com/products/SB-216763.html">https://www.selleckchem.com/products/SB-216763.html</a>                                                                                                                                     |
| Triciribine                     | Sigma-Aldrich            | T3830        | <a href="https://www.sigmaaldrich.com/MO/en/product/sigma/t3830">https://www.sigmaaldrich.com/MO/en/product/sigma/t3830</a>                                                                                                                               |
| SCH772984                       | Selleck Chemicals        | S7101        | <a href="https://www.selleckchem.com/products/sch772984.html">https://www.selleckchem.com/products/sch772984.html</a>                                                                                                                                     |
| 3-Isobutyl-1-methylxanthine     | Sigma-Aldrich            | I5879        | <a href="https://www.sigmaaldrich.com/MO/en/product/sigma/i5879">https://www.sigmaaldrich.com/MO/en/product/sigma/i5879</a>                                                                                                                               |
| Dexamethasone                   | Sigma-Aldrich            | 265005       | <a href="https://www.sigmaaldrich.com/MO/en/product/mm/265005">https://www.sigmaaldrich.com/MO/en/product/mm/265005</a>                                                                                                                                   |
| Mouse Insulin ELISA             | ALPCO                    | 80-INSMS-E01 | <a href="https://www.alpco.com/mouse-insulin-elisa.html">https://www.alpco.com/mouse-insulin-elisa.html</a>                                                                                                                                               |
| Mouse Adiponectin ELISA         | R&D system               | MRP300       | <a href="https://www.rndsystems.com/products/mouse-adiponectin-acrp30-quantikine-elisa-kit_mrp300">https://www.rndsystems.com/products/mouse-adiponectin-acrp30-quantikine-elisa-kit_mrp300</a>                                                           |
| Triglyceride assay kit          | Sigma-Aldrich            | mak264       | <a href="https://www.sigmaaldrich.com/MO/en/product/sigma/mak264">https://www.sigmaaldrich.com/MO/en/product/sigma/mak264</a>                                                                                                                             |
| Oil Red O                       | Sigma-Aldrich            | O0625        | <a href="https://www.sigmaaldrich.com/MO/en/product/sial/o0625?srltid=AfmBOorDri0kOZfQO-fFj_2iJAxDtxW_923pPICIiImJCxxyCAEu4vKH">https://www.sigmaaldrich.com/MO/en/product/sial/o0625?srltid=AfmBOorDri0kOZfQO-fFj_2iJAxDtxW_923pPICIiImJCxxyCAEu4vKH</a> |
| Hematoxylin and Eosin Stain Kit | VectorLab                | H-3502       | <a href="https://vectorlabs.com/products/hematoxylin-and-eosin-stain-kit">https://vectorlabs.com/products/hematoxylin-and-eosin-stain-kit</a>                                                                                                             |
| Calcein AM                      | Sigma-Aldrich            | 206700       | <a href="https://www.sigmaaldrich.com/MO/en/product/mm/206700">https://www.sigmaaldrich.com/MO/en/product/mm/206700</a>                                                                                                                                   |
| DAPI                            | Sigma-Aldrich            | D9542        | <a href="https://www.sigmaaldrich.com/MO/en/product/sigma/d9542">https://www.sigmaaldrich.com/MO/en/product/sigma/d9542</a>                                                                                                                               |

DOI [to be added]

|                                       |                           |            |                                                                                                                                                                                                                                                           |
|---------------------------------------|---------------------------|------------|-----------------------------------------------------------------------------------------------------------------------------------------------------------------------------------------------------------------------------------------------------------|
| Seahorse XF Base Medium               | Agilent                   | 102353-100 | <a href="https://www.agilent.com/cs/library/datasheets/public/XF-base-medium-data-sheet.pdf">https://www.agilent.com/cs/library/datasheets/public/XF-base-medium-data-sheet.pdf</a>                                                                       |
| Seahorse XF Cell Mito Stress Test Kit | Agilent                   | 103015-100 | <a href="https://www.agilent.com/cs/library/usermanuals/public/XF_Cell_Mito_Stress_Test_Kit_User_Guide.pdf">https://www.agilent.com/cs/library/usermanuals/public/XF_Cell_Mito_Stress_Test_Kit_User_Guide.pdf</a>                                         |
| DMEM                                  | Thermo Fisher Scientific  | 11995065   | <a href="https://www.thermofisher.com/order/catalog/product/11995065">https://www.thermofisher.com/order/catalog/product/11995065</a>                                                                                                                     |
| EDTA                                  | Thermo Fisher Scientific  | AM9260G    | <a href="https://www.thermofisher.com/order/catalog/product/AM9260G?SID=srch-srp-AM9260G">https://www.thermofisher.com/order/catalog/product/AM9260G?SID=srch-srp-AM9260G</a>                                                                             |
| Formaldehyde solution                 | Sigma-Aldrich             | F1635      | <a href="https://www.sigmaaldrich.com/MO/en/product/sigald/f1635">https://www.sigmaaldrich.com/MO/en/product/sigald/f1635</a>                                                                                                                             |
| Fetal bovine serum                    | Thermo Fisher Scientific  | 10270106   | <a href="https://www.thermofisher.com/order/catalog/product/10270106?SID=srch-srp-10270106">https://www.thermofisher.com/order/catalog/product/10270106?SID=srch-srp-10270106</a>                                                                         |
| Penicillin-Streptomycin               | Thermo Fisher Scientific  | 15070063   | <a href="https://www.thermofisher.com/order/catalog/product/15070063?SID=srch-srp-15070063">https://www.thermofisher.com/order/catalog/product/15070063?SID=srch-srp-15070063</a>                                                                         |
| Rabbit IgG Isotype Control            | Cell Signaling Technology | 3900       | <a href="https://www.cellsignal.cn/products/primary-antibodies/rabbit-dallemab-igg-xp-isotype-control/3900">https://www.cellsignal.cn/products/primary-antibodies/rabbit-dallemab-igg-xp-isotype-control/3900</a>                                         |
| Mouse IgG                             | Abcam                     | Ab280974   | <a href="https://www.abcam.com/en-us/products/primary-antibodies/mouse-igg1-monoclonal-r312-mouseigg1-isotype-control-ab280974">https://www.abcam.com/en-us/products/primary-antibodies/mouse-igg1-monoclonal-r312-mouseigg1-isotype-control-ab280974</a> |
| Nitrocellulose Membrane               | BIO-RAD                   | 1620115    | <a href="https://www.bio-rad.com/en-mo/product/nitrocellulose-membrane-0-45-um?ID=9b5b2069-356c-447b-a0fd-cae196945394">https://www.bio-rad.com/en-mo/product/nitrocellulose-membrane-0-45-um?ID=9b5b2069-356c-447b-a0fd-cae196945394</a>                 |
| Western diet                          | Research Diets Inc.,      | D12492     | <a href="https://researchdiets.com/formulas/d12492">https://researchdiets.com/formulas/d12492</a>                                                                                                                                                         |

## ARRIVE GUIDELINES

The ARRIVE guidelines (<https://arriveguidelines.org/>) are a checklist of recommendations to improve the reporting of research involving animals. Key elements of the study design should be included below to better enable readers to scrutinize the research adequately, evaluate its methodological rigor, and reproduce the methods or findings.

### Study Design

| Groups   | Sex | Age   | Number (prior to experiment) | Number (after termination) | Littermates (Yes/No) | Other description            |
|----------|-----|-------|------------------------------|----------------------------|----------------------|------------------------------|
| Group 1  | M   | 16 wk | 6                            | 6                          | Y                    | Wild type+NCD                |
| Group 2  | M   | 16 wk | 6                            | 6                          | Y                    | Wild type+HFD                |
| Group 3  | M   | 16 wk | 6                            | 6                          | Y                    | Wild type+HFD+SB             |
| Group 4  | M/F | 26 wk | 9                            | 9                          | Y                    | GSK3 $\beta^{fl/fl}$ ; HFD   |
| Group 5  | M/F | 26 wk | 9                            | 9                          | Y                    | GSK3 $\beta^{ADKO}$ ; HFD    |
| Group 6  | M/F | 26 wk | 5                            | 5                          | Y                    | GSK3 $\alpha^{fl/fl}$ ; HFD  |
| Group 7  | M/F | 26 wk | 5                            | 5                          | Y                    | GSK3 $\alpha^{ADKO}$ ; HFD   |
| Group 8  | M   | 26 wk | 5                            | 5                          | Y                    | GSK3 $\beta^{ADKO}$ ; HFD+PT |
| Group 9  | M   | 26 wk | 5                            | 5                          | Y                    | GSK3 $\beta^{ADKO}$ ; HFD+CC |
| Group 10 | F   | 26 wk | 6                            | 6                          | Y                    | GSK3 $\beta^{ADKO}$ ; HFD+PT |
| Group 11 | F   | 26 wk | 5                            | 5                          | Y                    | GSK3 $\beta^{ADKO}$ ; HFD+CC |

**Sample Size:** Please explain how the sample size was decided Please provide details of any *a priori* sample size calculation, if done.

The number of animals utilized in each experiment was determined based on the typical sample size used in the field.

**Inclusion Criteria**

All mice with correct genotype were included in the study.

**Exclusion Criteria**

No mouse was excluded.

**Randomization**

Mice were allocated to each group randomly using a random number generator.

**Blinding**

The animal experiments were conducted by researchers who were blinded to the genotype and treatment assignments. All immunostaining quantification analysis were blinded.
